# Supplementary material for: Experiences of working as early career allied health professionals and doctors in rural and remote environments: a qualitative systematic review
Source: Research Square preprint supplement (doi:10.21203/rs.3.rs-1360152/v1), 2022-03-11
Supplement: Supplementary file 1 [file 7225564bfcb80384c6bbb6bc.docx]

### Critical Appraisal Results

| **Author** | **Q1** | **Q2*** | **Q3*** | **Q4*** | **Q5** | **Q6*** | **Q7*** | **Q8** | **Q9** | **Q10** | **Total** |
| --- | --- | --- | --- | --- | --- | --- | --- | --- | --- | --- | --- |
| Bayley SA, Magin PJ, Sweatman JM, Regan CM.(40) | Y | Y | Y | Y | Y | N | N | Y | Y | Y | 8 |
| Bonney A, Mullan J, Hammond A, Burns P, Yeo G, Thomson B, et al. (45) | U | Y | Y | Y | Y | N | N | Y | Y | Y | 7 |
| Brown L, Smith T, Wakely L, Little A, Wolfgang R, Burrows J. (34) | Y | Y | Y | Y | Y | N | N | Y | Y | Y | 8 |
| Campbell AM, Brown J, Simon DR, Young S, Kinsman L.(39) | Y | Y | Y | Y | Y | N | N | Y | Y | Y | 8 |
| Cleland J, Johnston PW, Walker L, Needham G. (44) | Y | Y | Y | Y | Y | N | N | Y | Y | Y | 8 |
| Cosgrave C. 2020.(33) | Y | Y | Y | Y | Y | N | N | Y | Y | Y | 8 |
| Cuesta-Briand B, Coleman M, Ledingham R, Moore S, Wright H, Oldham D, et al. (49) | Y | Y | Y | Y | Y | N | N | Y | Y | Y | 8 |
| Cuesta-Briand B, Coleman M, Ledingham R, Moore S, Wright H, Oldham D, et al. (56) | Y | Y | Y | Y | Y | N | N | Y | Y | Y | 8 |
| Devine S.(36) | Y | Y | Y | Y | Y | N | Y | Y | Y | Y | 9 |
| Devine SG, Williams G, Nielsen I. (38) | N | Y | Y | Y | Y | N | N | Y | Y | Y | 7 |
| Doyle C, Isles C, Wilson P.(51) | U | Y | Y | Y | Y | N | N | Y | Y | Y | 7 |
| Edwards SL, Sergio Da Silva AL, Rapport FL, McKimm J, Williams R. (54) | Y | Y | Y | Y | Y | N | N | Y | Y | Y | 8 |
| Eley DS, Synnott R, Baker PG, Chater AB.(57) | U | Y | Y | Y | Y | N | N | Y | Y | Y | 7 |
| Elliott T, Bromley T, Chur-Hansen A, Laurence C. (47) | Y | Y | Y | Y | Y | Y | Y | Y | Y | Y | 10 |
| Gill SD, Stella J, Blazeska M, Bartley B.(41) | Y | Y | Y | Y | Y | N | N | Y | Y | Y | 8 |
| Iedema R, Brownhill S, Haines M, Lancashire B, Shaw T, Street J.(58) | U | U | Y | U | U | N | N | Y | Y | Y | 4 |
| Isaacs AN, Raymond A, Jacob A, Hawkings P.(42) | U | Y | Y | Y | Y | N | N | Y | Y | Y | 7 |
| Keane S, Lincoln M, Smith T. (37) | Y | Y | Y | Y | Y | N | Y | Y | Y | Y | 9 |
| Lee S, Mackenzie L.(31) | Y | Y | Y | Y | Y | N | Y | Y | Y | Y | 9 |
| Malau-Aduli BS, Smith AM, Young L, Sen Gupta T, Hays R. (53) | Y | Y | Y | Y | Y | N | Y | Y | Y | Y | 9 |
| Martin R, Mandrusiak A, Lu A, Forbes R.(35) | Y | Y | Y | Y | Y | N | Y | Y | Y | Y | 9 |
| McKillop A, Webster C, Bennett W, O’Connor B, Bagg W. (43) | Y | Y | Y | Y | Y | N | N | Y | Y | Y | 8 |
| Mugford BV, Braund W, Worley P, Martin A.(50) | Y | Y | Y | Y | Y | N | N | Y | N | Y | 7 |
| Myhre DL, Hohman S.(59) | Y | Y | Y | Y | Y | N | N | Y | Y | Y | 8 |
| Pandit T, Sabesan S, Ray RA. (52) | Y | Y | Y | Y | Y | N | Y | Y | Y | Y | 9 |
| Peel R, Young L, Reeve C, Kanakis K, Malau-Aduli B, Sen Gupta T, et al. (60) | Y | Y | Y | Y | Y | Y | Y | Y | Y | Y | 10 |
| Smith DM. (46) | Y | Y | Y | Y | Y | N | Y | Y | N | Y | 8 |
| Stagg P, Greenhill J, Worley PS.(61) | Y | Y | Y | Y | Y | N | N | Y | Y | Y | 8 |
| Steenbergen K, Mackenzie L. (30) | Y | Y | Y | Y | Y | N | N | Y | Y | Y | 8 |
| Thackrah RD, Thompson SC. (32) | Y | Y | Y | Y | Y | N | Y | Y | Y | Y | 9 |
| Walters L, Laurence CO, Dollard J, Elliott T, Eley DS. (48) | Y | Y | Y | Y | Y | Y | Y | Y | Y | Y | 10 |
| Wearne SM.(62) | Y | Y | Y | Y | Y | Y | Y | Y | Y | Y | 10 |
|  | 81.25% | 96.87% | 100.0% | 96.87% | 96.87% | 12.5% | 37.5% | 100.0% | 93.75% | 100.0% | Total |

1. Is there congruity between the stated philosophical perspective and the research methodology?
2. Is there congruity between the research methodology and the research question or objectives?
3. Is there congruity between the research methodology and the methods used to collect data?
4. Is there congruity between the research methodology and the representation and analysis of data?
5. Is there congruity between the research methodology and the interpretation of results?
6. Is there a statement locating the researcher culturally or theoretically?
7. Is the influence of the researcher on the research, and vice- versa, addressed?
8. Is the influence of the researcher on the research, and vice- versa, addressed?
9. Is the research ethical according to current criteria or, for recent studies, and is there evidence of ethical approval by an appropriate body?
10. Do the conclusions drawn in the research report flow from the analysis, or interpretation, of the data?

Lockwood C, Porritt K, Munn Z, Rittenmeyer L, Salmond S, Bjerrum M, et al. Chapter 2: Systematic reviews of qualitative evidence. In: Aromataris E, Munn Z, editors. JBI manual for evidence synthesis: JBI; 202
